# Supplementary material
Source: PubMed Central journal article supplement (PMC2763634)
Supplement: NIHMS127377-supplement-2.pdf [file NIHMS127377-supplement-2.pdf]

## Supplemental Material Table 1.

Primers used to resequence *NT5C3* and create expression constructs

| Primer Name                      | Primer Sequence                       |
|----------------------------------|---------------------------------------|
| F-5'-FR & Exon 1(NM_001002009.1) | GGTGCAA <del>A</del> ACTGGATTTCATAAAA |
| R-5'-FR & Exon 1(NM_001002009.1) | CTAGCGAGATCCCAGCCTGA                  |
| F-5'-FR & Exon 1(NM_016489.11)   | GGACAGTAGAGAGAAAGCCGATA               |
| R-5'-FR & Exon 1(NM_016489.11)   | CCCTCAACCTGGAAAGAGACT                 |
| F-Exon 2                         | TGGCATAACAGGAAGAACCTG                 |
| R-Exon 2                         | TCTGAGAAGCACGACAATGTG                 |
| F-Exon R                         | ATGGTTGTATGTTGCACAGGAG                |
| R-Exon R                         | ACCAATCCATTATGGTGAAAGC                |
| F-Exon 3                         | GCTTGGTGTCCCACACTTTT                  |
| R-Exon 3                         | GGAAGCTGAGGAGGGAAAAC                  |
| F-Exon 4                         | TATAAAGGAACCGCATGAGAAAA               |
| R-Exon 4                         | AAGAAAAAGCAGGTCTCCTCACT               |
| F-Exon 5 & Exon 6                | TCTCAGTGATGTAAGCGAGCA                 |
| R-Exon 5 & Exon 6                | TCTGTTTGTGGCAATACAGGT                 |
| F-Exon 7                         | GGAGGACTGGGAAACTCAGTAA                |
| R-Exon 7                         | AGGTGGCATATTTTGGATATGG                |
| F-Exon 8                         | ACAGCCCTCTTGGGCAGTAT                  |
| R-Exon 8R                        | GAGAAGGATGGAGTCCCACA                  |
| F-Exon 9 & Exon 10               | AGCTATGGTGAATGTGATGGACT               |
| R-Exon 9 & Exon 10               | AGTGTGTTGAGAGAGGTGGAGAA               |

### *Site-directed mutagenesis, expression construct*

|                 |                                            |
|-----------------|--------------------------------------------|
| F-Exon 2 (9)    | ATGACTAA <u>C</u> CAAGAGTCTGCCGTACATGTGAA  |
| R-Exon 2 (9)    | TTCACATGTACGGCAGACTCTT <u>G</u> TTAGTCAT   |
| F-Exon 6 (276)  | ACTAAAGGAAAAATA <u>T</u> TACGCTATTGAAGTTG  |
| R-Exon 6 (276)  | CAACTTCAATAGCGTA <u>A</u> TATTTTTCCCTTAGT  |
| F-Exon 6 (306)  | TGATCCTGTTCTTAC <u>C</u> GTAGAAGAGAAGTACC  |
| R-Exon 6 (306)  | GGTACTTCTCTTCTAC <u>G</u> GTAAGTTCAGGATCA  |
| F-Exon 9 (959)  | AGTGGCCAATGTTGA <u>A</u> CACATTCTGAAAATTG  |
| R-Exon 9 (959)  | CAATTTTCAGAATGTG <u>T</u> TCAACATTGGCCACT  |
| F-Exon 10 (847) | ATTGTTTTAGTACA <u>A</u> CATGAATCATTAGAAGT  |
| R-Exon 10 (847) | ACTTCTAATGATTCAT <u>G</u> TTGTTACTAAAACAAT |

Bold, underlined letters are mutated bases in site-directed mutagenesis primers.

| Haplotype frequency |        |       |        |        |         |         |         |         |         |         |        |        |        |        |        |        |        |        |        |        |        |        |        |       |         |         |         |         |         |         |   |
|---------------------|--------|-------|--------|--------|---------|---------|---------|---------|---------|---------|--------|--------|--------|--------|--------|--------|--------|--------|--------|--------|--------|--------|--------|-------|---------|---------|---------|---------|---------|---------|---|
| observed            | allele | AA    | CA     | HCA    | MA      | (-1273) | (-1270) | (-1145) | (-1143) | (-1018) | (-944) | (-884) | (-693) | (-656) | (-654) | (-653) | (-552) | (-373) | (-354) | (-340) | (-302) | (-267) | (-258) | (-67) | (-5780) | (-5767) | (-5757) | (-5756) | (-5714) | (-5705) |   |
| o                   | *1A    | 0.200 |        |        | 0.167   | A       | T       | T       | G       | T       | T      | D      | C      | C      | G      | T      | G      | C      | T      | T      | A      | D      | D      | T     | C       | A       | A       | T       | A       | C       |   |
| o                   | *1B    | 0.158 | 0.289  | 0.192  | 0.433   | A       | T       | G       | G       | T       | T      | D      | C      | C      | G      | T      | G      | C      | T      | T      | A      | D      | D      | T     | C       | A       | A       | T       | A       | C       |   |
| o                   | *1C    | 0.150 | 0.292  | 0.300  | 0.133   | A       | T       | T       | A       | T       | T      | D      | C      | C      | G      | T      | G      | C      | T      | T      | A      | D      | D      | T     | C       | A       | A       | T       | A       | C       |   |
| o                   | *1D    | 0.083 |        |        |         | A       | T       | T       | G       | T       | T      | D      | C      | C      | G      | T      | C      | C      | T      | T      | A      | D      | D      | T     | C       | A       | A       | T       | A       | C       |   |
| o                   | *1E    | 0.075 |        |        |         | A       | T       | T       | A       | T       | T      | D      | C      | C      | G      | T      | G      | C      | T      | T      | A      | D      | D      | T     | C       | A       | A       | T       | A       | C       |   |
| i                   | *1F    | 0.058 |        |        |         | A       | T       | T       | G       | T       | T      | D      | C      | C      | G      | T      | C      | C      | T      | T      | A      | D      | D      | T     | C       | A       | A       | T       | A       | C       |   |
| i                   | *1G    | 0.058 |        |        |         | C       | T       | T       | G       | T       | T      | D      | C      | C      | G      | T      | C      | C      | T      | T      | A      | D      | D      | T     | C       | A       | A       | T       | A       | C       |   |
| i                   | *1H    | 0.050 |        |        |         | A       | T       | T       | A       | T       | T      | D      | C      | C      | G      | T      | C      | C      | T      | T      | A      | D      | D      | T     | C       | A       | A       | T       | A       | C       |   |
| i                   | *1I    | 0.033 | 0.008  |        |         | A       | T       | T       | G       | T       | T      | D      | C      | C      | G      | T      | C      | C      | T      | T      | A      | D      | D      | T     | C       | A       | A       | T       | A       | C       |   |
| i                   | *1J    | 0.025 |        |        |         | A       | T       | T       | G       | T       | T      | D      | C      | C      | G      | T      | C      | C      | T      | T      | A      | D      | D      | T     | C       | A       | A       | T       | A       | C       |   |
| i                   | *1K    | 0.017 |        |        |         | A       | T       | G       | G       | T       | T      | D      | C      | C      | A      | T      | C      | C      | T      | T      | A      | D      | D      | T     | C       | A       | A       | T       | A       | C       |   |
| i                   | *1L    | 0.008 |        |        |         | A       | T       | G       | C       | T       | T      | D      | C      | C      | G      | T      | C      | C      | T      | T      | A      | D      | D      | T     | C       | A       | A       | T       | A       | C       |   |
| i                   | *1M    | 0.008 |        |        |         | A       | T       | T       | G       | T       | T      | D      | C      | C      | G      | T      | C      | C      | T      | T      | A      | D      | D      | T     | C       | A       | A       | T       | A       | C       |   |
| i                   | *1N    | 0.008 |        |        |         | A       | T       | T       | G       | T       | T      | D      | C      | C      | G      | T      | C      | C      | T      | T      | A      | D      | D      | T     | C       | A       | A       | T       | A       | C       |   |
| i                   | *1O    | 0.008 |        |        |         | C       | T       | T       | G       | T       | C      | D      | C      | C      | G      | T      | C      | C      | T      | T      | A      | D      | D      | T     | C       | A       | A       | T       | A       | C       |   |
| i                   | *1P    | 0.009 |        |        |         | C       | T       | T       | G       | T       | T      | D      | C      | C      | G      | T      | C      | C      | T      | T      | A      | D      | D      | T     | C       | A       | A       | T       | A       | C       |   |
| i                   | *1Q    | 0.008 |        |        |         | C       | T       | T       | G       | T       | T      | D      | C      | C      | G      | T      | C      | C      | T      | T      | A      | D      | D      | T     | C       | A       | A       | T       | A       | C       |   |
| o                   | *1R    |       | 0.225  | 0.150* | 0.117   | A       | T       | T       | G       | T       | T      | D      | C      | C      | C      | G      | T      | C      | C      | T      | T      | A      | D      | D     | T       | C       | A       | A       | T       | A       | C |
| o                   | *1S    |       | 0.042* | 0.083  | 0.067   | A       | T       | T       | G       | T       | T      | D      | C      | C      | A      | T      | C      | C      | T      | T      | A      | D      | D      | T     | C       | A       | A       | T       | A       | C       |   |
| i                   | *1T    |       | 0.036  |        |         | A       | T       | G       | G       | T       | T      | D      | C      | C      | G      | T      | C      | C      | T      | T      | A      | D      | D      | T     | C       | A       | A       | T       | A       | C       |   |
| i                   | *1U    |       | 0.019  |        |         | A       | T       | G       | G       | T       | T      | D      | C      | C      | G      | T      | G      | C      | T      | T      | A      | D      | D      | T     | C       | A       | A       | T       | A       | C       |   |
| i                   | *1V    |       | 0.017  | 0.008  |         | A       | T       | T       | G       | T       | T      | D      | C      | C      | G      | T      | C      | C      | T      | T      | A      | D      | D      | T     | C       | A       | A       | T       | A       | C       |   |
| i                   | *1W    |       | 0.017  |        |         | A       | T       | T       | G       | T       | T      | D      | C      | C      | T      | G      | T      | C      | C      | T      | T      | A      | D      | D     | T       | C       | A       | A       | T       | A       | C |
| i                   | *1X    |       | 0.008  |        |         | A       | C       | T       | G       | T       | T      | D      | C      | C      | G      | T      | C      | C      | T      | T      | A      | D      | D      | T     | C       | A       | A       | T       | A       | C       |   |
| i                   | *1Y    |       | 0.008  |        |         | A       | T       | T       | G       | T       | T      | D      | C      | C      | G      | T      | C      | C      | T      | T      | A      | D      | D      | T     | C       | A       | A       | T       | A       | C       |   |
| i                   | *1Z    |       | 0.008  |        |         | A       | T       | T       | G       | T       | T      | D      | C      | C      | G      | T      | C      | C      | T      | T      | A      | D      | D      | T     | C       | A       | A       | T       | A       | C       |   |
| i                   | *1AA   |       | 0.008  |        |         | A       | T       | T       | G       | T       | T      | D      | C      | C      | G      | T      | C      | C      | T      | T      | A      | D      | D      | T     | C       | A       | A       | T       | A       | C       |   |
| i                   | *1AB   |       | 0.008  |        |         | A       | T       | T       | G       | T       | T      | D      | C      | C      | G      | T      | G      | C      | T      | T      | A      | D      | D      | T     | C       | A       | A       | T       | A       | C       |   |
| o                   | *1AC   |       |        | 0.125  | 0.0167* | A       | T       | T       | G       | T       | T      | D      | C      | C      | G      | T      | C      | C      | T      | T      | A      | D      | D      | T     | C       | A       | A       | T       | A       | C       |   |
| o                   | *1AD   |       |        | 0.083  |         | A       | T       | T       | G       | T       | T      | D      | C      | C      | A      | T      | C      | C      | T      | T      | A      | D      | D      | T     | C       | A       | A       | T       | A       | C       |   |
| i                   | *1AE   |       |        | 0.033  |         | A       | T       | G       | G       | T       | T      | D      | C      | C      | G      | T      | G      | C      | T      | T      | A      | D      | D      | T     | C       | A       | A       | T       | A       | C       |   |
| o                   | *1AF   |       |        | 0.025  |         | A       | T       | G       | G       | T       | T      | D      | C      | C      | G      | T      | G      | C      | T      | T      | A      | D      | D      | T     | C       | A       | A       | T       | A       | C       |   |
| i                   | *1AG   |       |        | 0.017  |         | A       | T       | T       | G       | T       | T      | D      | C      | C      | G      | T      | C      | C      | T      | T      | A      | D      | D      | T     | C       | A       | A       | T       | A       | C       |   |
| i                   | *1AH   |       |        | 0.008  |         | A       | T       | T       | A       | T       | T      | D      | C      | C      | G      | T      | C      | C      | T      | T      | A      | D      | D      | T     | C       | A       | A       | T       | A       | C       |   |
| i                   | *1AJ   |       |        | 0.008  |         | A       | T       | T       | G       | T       | T      | D      | C      | C      | A      | T      | C      | C      | T      | T      | A      | D      | D      | T     | C       | A       | A       | T       | A       | C       |   |
| i                   | *1AK   |       |        | 0.008  |         | A       | T       | T       | G       | T       | T      | D      | C      | C      | G      | C      | C      | C      | T      | T      | A      | D      | D      | T     | C       | A       | A       | T       | A       | C       |   |
| i                   | *1AL   |       |        | 0.008  |         | A       | T       | T       | G       | T       | T      | D      | C      | C      | G      | T      | C      | C      | T      | T      | A      | D      | D      | T     | C       | A       | A       | T       | A       | C       |   |
| i                   | *1AM   |       |        |        | 0.008   | A       | T       | T       | G       | T       | T      | D      | C      | C      | A      | T      | C      | C      | T      | T      | A      | D      | D      | T     | C       | A       | A       | T       | A       | C       |   |
| i                   | *1AN   |       |        |        | 0.008   | A       | T       | T       | G       | T       | T      | D      | C      | C      | G      | T      | C      | C      | T      | T      | A      | D      | D      | T     | C       | A       | A       | T       | A       | C       |   |
| i                   | *1AO   |       |        |        | 0.008   | A       | T       | T       | G       | T       | T      | D      | C      | C      | G      | T      | C      | C      | T      | T      | A      | D      | D      | T     | C       | A       | A       | T       | A       | C       |   |
| i                   | *1AP   |       |        |        | 0.008   | A       | T       | T       | G       | T       | T      | D      | C      | C      | G      | T      | C      | C      | T      | T      | A      | D      | D      | T     | C       | A       | A       | T       | A       | C       |   |
| i                   | *2A    |       |        |        | 0.008   | A       | T       | T       | G       | T       | T      | D      | C      | C      | A      | T      | C      | C      | T      | T      | A      | D      | D      | T     | C       | A       | A       | T       | A       | C       |   |

| Haplotype frequency |        |       |        |        |         |         |         |         |         |         |         |       |          |        |        |          |        |         |         |         |         |         |       |        |         |        |        |          |         |          |
|---------------------|--------|-------|--------|--------|---------|---------|---------|---------|---------|---------|---------|-------|----------|--------|--------|----------|--------|---------|---------|---------|---------|---------|-------|--------|---------|--------|--------|----------|---------|----------|
| observed            | allele | AA    | CA     | HCA    | MA      | (-5635) | (-5633) | (-5418) | (-5059) | (-4900) | (-4645) | E2(9) | I2(-237) | I2(-4) | I4(35) | I4(-114) | I5(77) | I5(266) | I5(430) | I5(548) | E6(276) | E6(306) | I6(9) | I6(71) | E9(759) | I9(52) | I9(61) | I9(-267) | I9(-38) | E10(847) |
| o                   | *1A    | 0.200 |        |        | 0.167   | G       | A       | G       | G       | G       | T       | G     | T        | C      | G      | C        | G      | G       | A       | C       | T       | A       | C     | G      | T       | A      | A      | C        | G       |          |
| o                   | *1B    | 0.158 | 0.289  | 0.192  | 0.433   | G       | A       | G       | G       | G       | T       | G     | T        | C      | G      | C        | G      | G       | A       | C       | T       | A       | C     | G      | T       | A      | A      | C        | G       |          |
| o                   | *1C    | 0.150 | 0.292  | 0.300  | 0.133   | G       | A       | G       | G       | G       | T       | G     | T        | C      | G      | C        | G      | G       | A       | C       | T       | A       | C     | G      | T       | A      | A      | C        | G       |          |
| o                   | *1D    | 0.083 |        |        |         | G       | A       | A       | G       | G       | T       | G     | T        | C      | G      | C        | A      | A       | A       | T       | T       | A       | C     | G      | T       | A      | A      | C        | G       |          |
| o                   | *1E    | 0.075 |        |        |         | G       | A       | A       | G       | G       | T       | G     | T        | C      | G      | C        | G      | G       | A       | A       | C       | C       | A     | C      | G       | T      | A      | A        | C       | G        |
| i                   | *1F    | 0.058 |        |        |         | G       | A       | A       | G       | G       | T       | G     | T        | C      | G      | C        | A      | A       | A       | C       | T       | A       | C     | T      | G       | T      | A      | A        | C       | G        |
| i                   | *1G    | 0.058 |        |        |         | G       | A       | A       | G       | G       | T       | G     | T        | C      | G      | C        | G      | G       | A       | A       | C       | T       | A     | C      | G       | T      | A      | A        | C       | G        |
| i                   | *1H    | 0.050 |        |        |         | G       | A       | A       | G       | G       | T       | G     | T        | C      | G      | C        | G      | G       | A       | A       | C       | T       | A     | C      | G       | T      | A      | A        | C       | G        |
| i                   | *1I    | 0.033 | 0.008  |        |         | G       | A       | A       | G       | G       | T       | G     | T        | C      | G      | C        | A      | A       | A       | T       | T       | A       | C     | T      | G       | T      | A      | A        | C       | G        |
| i                   | *1J    | 0.025 |        |        |         | G       | A       | A       | G       | G       | C       | G     | T        | C      | A      | C        | A      | A       | A       | T       | T       | A       | C     | G      | T       | A      | A      | C        | G       | G        |
| i                   | *1K    | 0.017 |        |        |         | G       | A       | A       | G       | G       | T       | G     | T        | C      | G      | C        | A      | A       | A       | T       | T       | A       | C     | T      | G       | T      | A      | A        | C       | G        |
| i                   | *1L    | 0.008 |        |        |         | G       | A       | A       | G       | G       | T       | G     | T        | C      | G      | C        | A      | A       | A       | T       | T       | A       | C     | G      | T       | A      | A      | C        | G       | G        |
| i                   | *1M    | 0.008 |        |        |         | G       | A       | A       | G       | G       | T       | C     | G        | T      | C      | G        | C      | A       | A       | A       | C       | T       | A     | C      | G       | T      | A      | A        | C       | G        |
| i                   | *1N    | 0.008 |        |        |         | G       | A       | A       | G       | G       | T       | G     | T        | C      | G      | C        | A      | A       | A       | C       | T       | A       | C     | G      | T       | A      | A      | C        | G       | G        |
| i                   | *1O    | 0.008 |        |        |         | G       | A       | A       | G       | G       | T       | G     | T        | C      | G      | C        | A      | A       | A       | C       | T       | A       | C     | G      | T       | A      | A      | C        | G       | G        |
| i                   | *1P    | 0.009 |        |        |         | G       | A       | A       | G       | G       | T       | G     | T        | C      | G      | C        | A      | A       | A       | T       | T       | A       | C     | G      | T       | A      | A      | C        | G       | G        |
| o                   | *1R    |       | 0.225  | 0.150* | 0.117   | G       | A       | A       | G       | G       | T       | G     | T        | C      | G      | C        | A      | A       | A       | T       | T       | A       | C     | G      | T       | A      | A      | C        | G       | G        |
| o                   | *1S    |       | 0.042* | 0.083  | 0.067   | G       | A       | A       | G       | G       | T       | G     | T        | C      | G      | C        | A      | A       | A       | T       | T       | A       | C     | G      | T       | A      | A      | C        | G       | G        |
| i                   | *1T    |       | 0.036  |        |         | G       | A       | A       | G       | G       | T       | G     | T        | C      | G      | C        | A      | A       | A       | T       | T       | A       | C     | G      | T       | A      | A      | C        | G       | G        |
| i                   | *1U    |       | 0.019  |        |         | G       | A       | A       | G       | G       | T       | G     | T        | C      | G      | C        | A      | A       | A       | T       | T       | A       | C     | G      | T       | A      | A      | C        | G       | G        |
| i                   | *1V    |       | 0.017  | 0.008  |         | G       | A       | A       | G       | G       | T       | G     | T        | C      | G      | C        | A      | A       | A       | C       | T       | A       | C     | G      | T       | A      | A      | C        | G       | G        |
| i                   | *1W    |       | 0.017  |        |         | G       | A       | A       | G       | G       | T       | G     | T        | C      | G      | C        | A      | A       | A       | T       | T       | A       | C     | T      | G       | T      | A      | A        | C       | G        |
| i                   | *1X    |       | 0.008  |        |         | G       | A       | A       | G       | G       | T       | G     | T        | C      | G      | C        | A      | A       | A       | T       | T       | A       | C     | T      | G       | T      | A      | A        | C       | G        |
| i                   | *1Y    |       | 0.008  |        |         | G       | A       | A       | G       | G       | T       | G     | T        | C      | G      | C        | A      | A       | A       | T       | T       | A       | C     | T      | G       | T      | A      | A        | C       | G        |
| i                   | *1Z    |       | 0.008  |        |         | G       | A       | A       | G       | G       | T       | G     | T        | C      | G      | C        | A      | A       | A       | T       | T       | A       | C     | T      | G       | T      | A      | A        | C       | G        |
| i                   | *1AA   |       | 0.008  |        |         | G       | A       | A       | G       | G       | T       | G     | T        | C      | G      | C        | A      | A       | A       | T       | T       | A       | C     | T      | G       | T      | A      | A        | C       | G        |
| i                   | *1AB   |       | 0.008  |        |         | G       | A       | A       | G       | G       | T       | G     | T        | C      | G      | C        | A      | A       | A       | C       | T       | A       | C     | A      | T       | A      | A      | C        | G       | G        |
| o                   | *1AC   |       |        | 0.125  | 0.0167* | G       | A       | A       | G       | G       | T       | G     | T        | C      | G      | C        | A      | A       | A       | T       | T       | A       | C</   |        |         |        |        |          |         |          |

|   |      |  |  |       |   |   |   |   |   |   |   |   |   |   |   |   |   |   |   |   |   |   |   |   |   |   |   |   |   |
|---|------|--|--|-------|---|---|---|---|---|---|---|---|---|---|---|---|---|---|---|---|---|---|---|---|---|---|---|---|---|
| i | *1AN |  |  | 0.008 | G | A | A | G | G | G | T | G | T | C | G | C | A | A | A | T | T | A | T | G | T | A | G | C | G |
| i | *1AO |  |  | 0.008 | G | A | A | G | G | G | T | G | T | C | G | C | A | A | A | T | T | A | T | G | T | A | G | C | G |
| i | *1AP |  |  | 0.008 | G | A | A | G | G | G | T | G | T | C | G | C | A | A | A | T | T | A | T | G | T | A | G | C | G |
| i | *2A  |  |  | 0.008 | G | A | A | G | G | G | T | G | T | C | G | C | A | A | A | T | T | A | T | G | T | A | G | C | C |

**Supplementary Table 2.** Human *NT5C3* haplotypes. Variant nucleotides compared with the "reference sequence" (i.e., the most common sequence in African American subjects) are highlighted as white on black. Initial haplotype designations (\*1 and \*2) were made on the basis of amino acid sequence, with the WT allozyme designated \*1. The \*2 designation was used for the sequence that encoded His283. Subsequent assignments/letter designations were made based on descending allele frequencies, starting with haplotypes present in African-American subjects. The symbols I and D at 5'-FR locations (-884), (-267) and (-258) represent insertions and deletions, respectively. Polymorphisms at positions 5'FR(-496), 5'UTR(-194), 5'UTR(-134), I1(-5694), I1(-5654), I1(-5125), I1(-19), I2(-307), I3(103), I5(533) and I5(647) were excluded from this table because they were not represented in any of the haplotypes listed. We used a 1% frequency cutoff for inclusion in the table, but haplotypes containing synonymous or nonsynonymous SNP with frequencies lower than 1% were also included. o = observed data; i = inferred data.

**Supplementary Figure 1.** Human *NT5C3* linkage disequilibrium in AA, CA, HCA and MA subjects.  $D'$  values were calculated for each polymorphism pair. All values shown in color were statistically significant ( $p < 0.05$ ). Numbers identifying individual polymorphisms are those listed in **Table 1**.

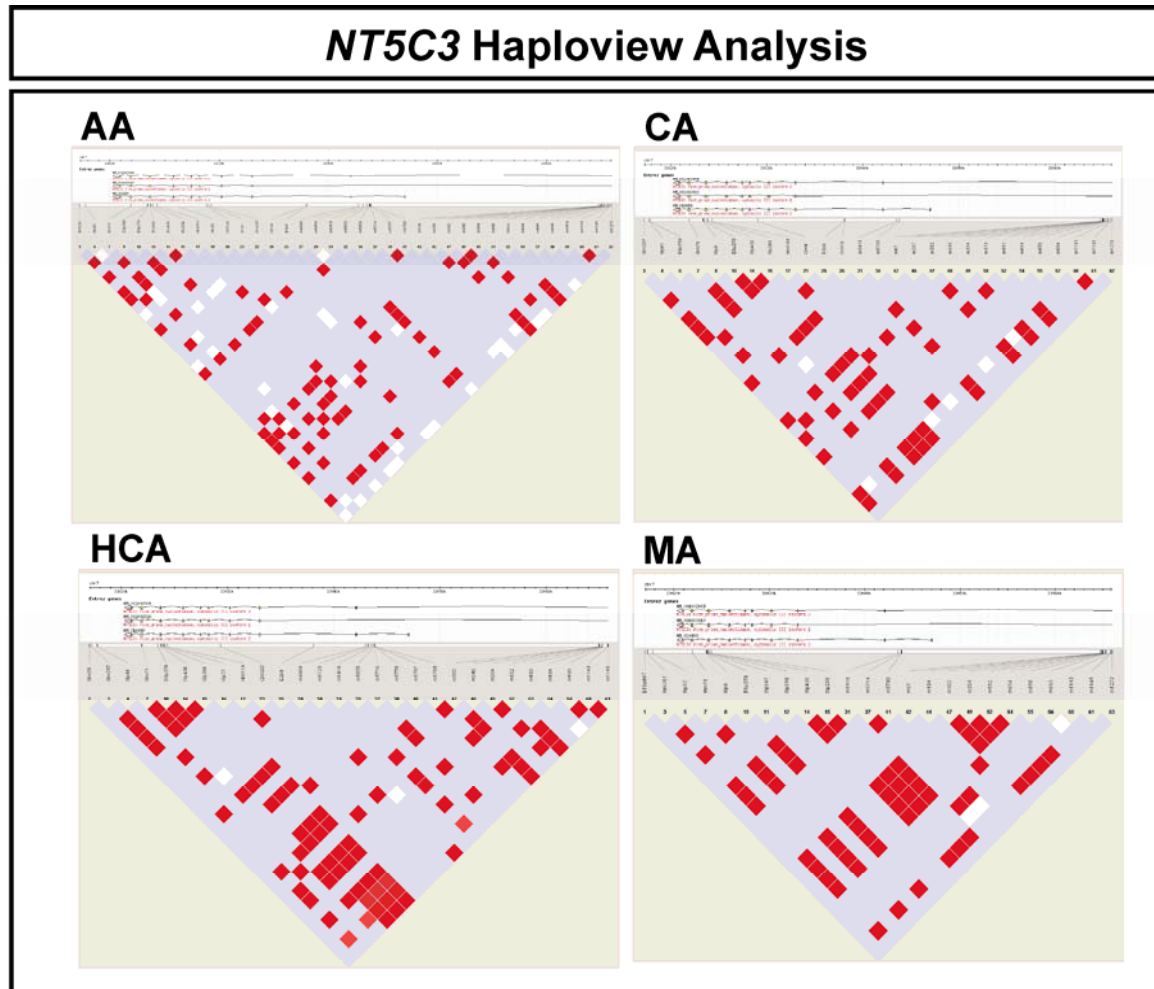

**Supplemental Figure 1**
